# Supplementary material for: Trend of Geographical Distribution of Stomach Cancer in Iran From 2004-2014
Source: Research Square preprint supplement (doi:10.21203/rs.3.rs-123586/v1), 2020-12-10
Supplement: Supplementary file 1 [file dd5b9ef0cf63183bbd9b1894.docx]

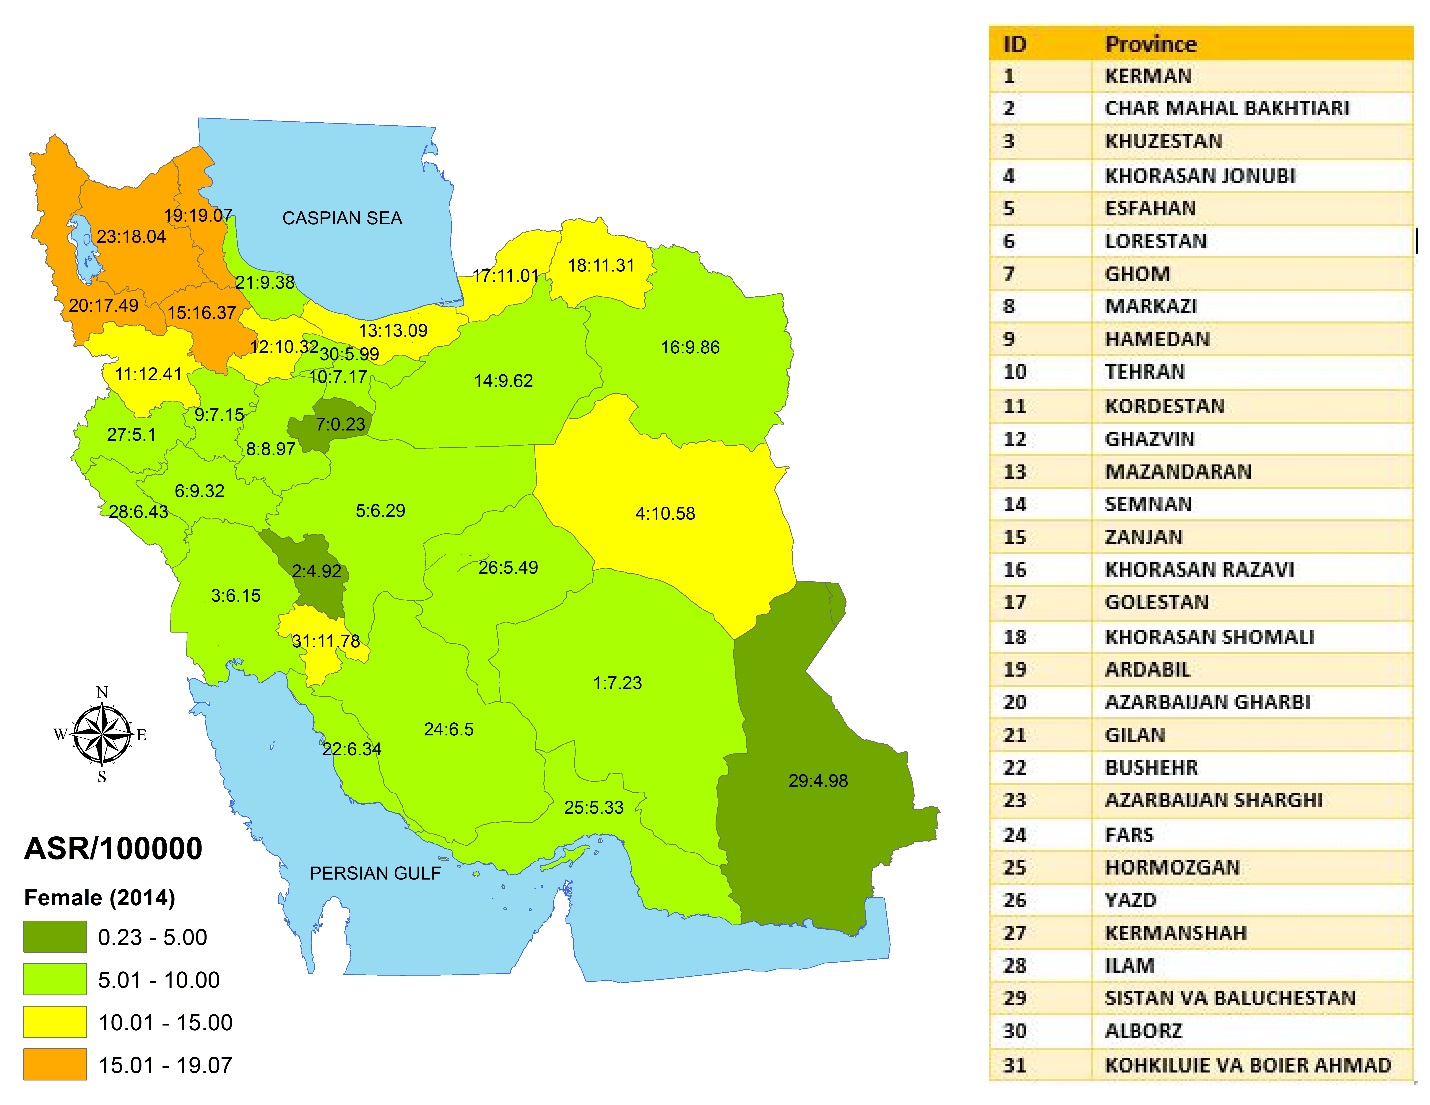


Supplementary Figure S1: distribution of ASR of stomach cancer by sex (female) in Iran in 2014

(GIS map were designed in GIS center, Department of Epidemiology, Shiraz University of Medical Sciences)


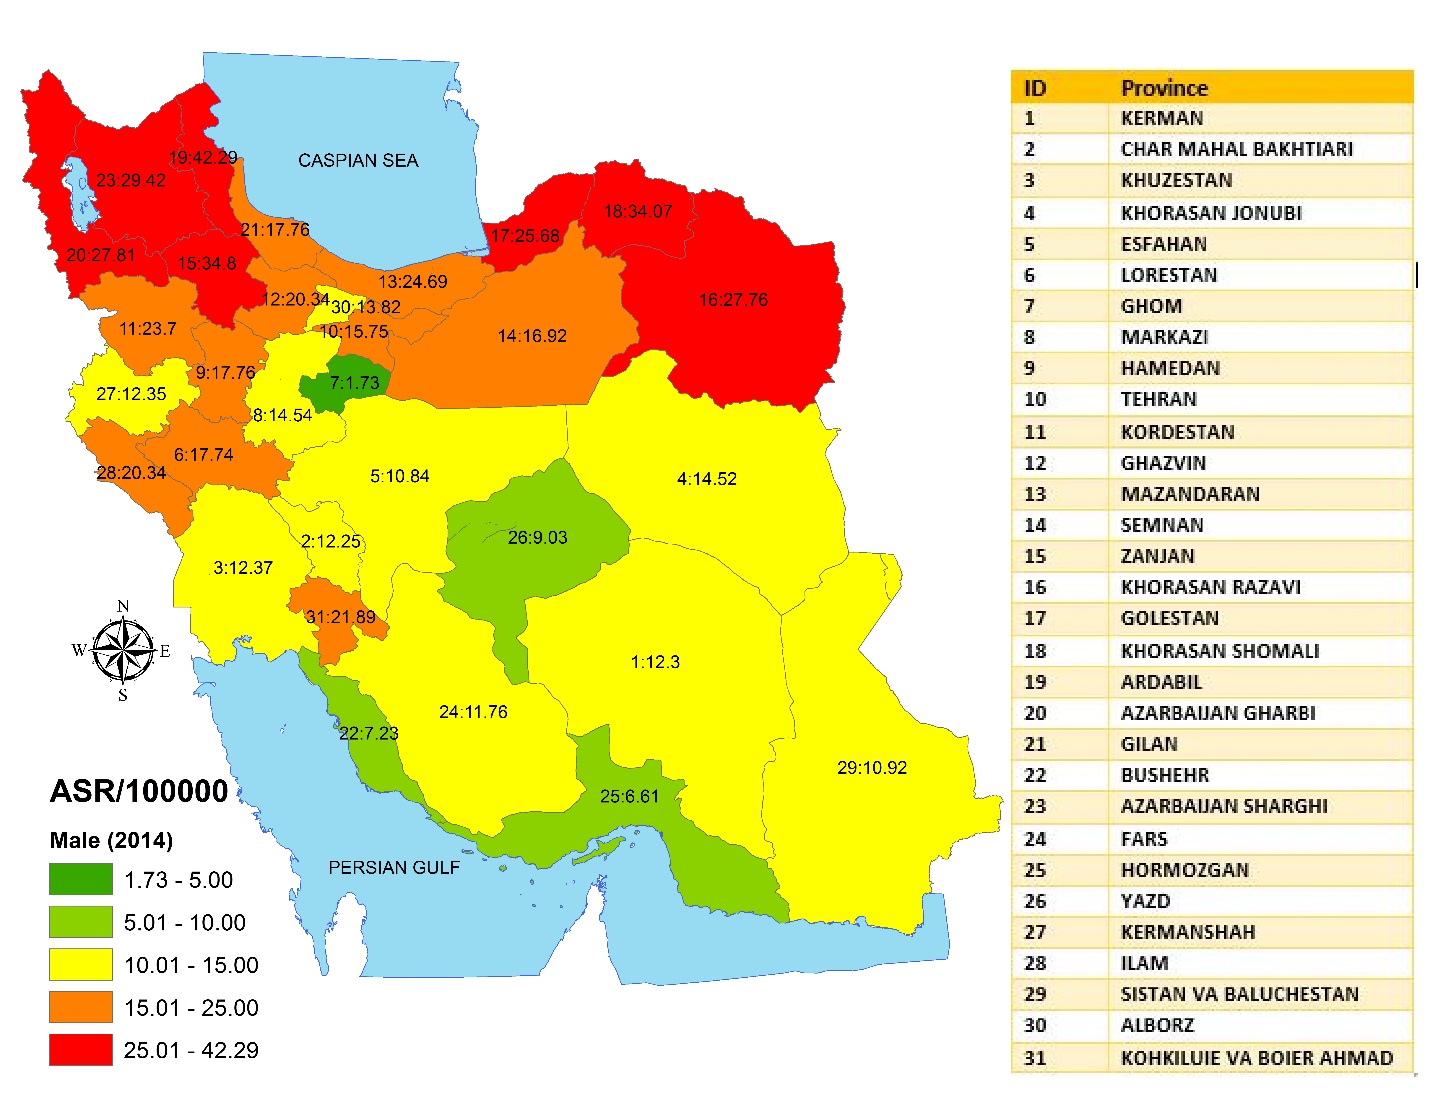


Supplementary Figure S2: distribution of ASR of stomach cancer by sex (men) in Iran in 2014

(GIS map were designed in GIS center, Department of Epidemiology, Shiraz University of Medical Sciences)


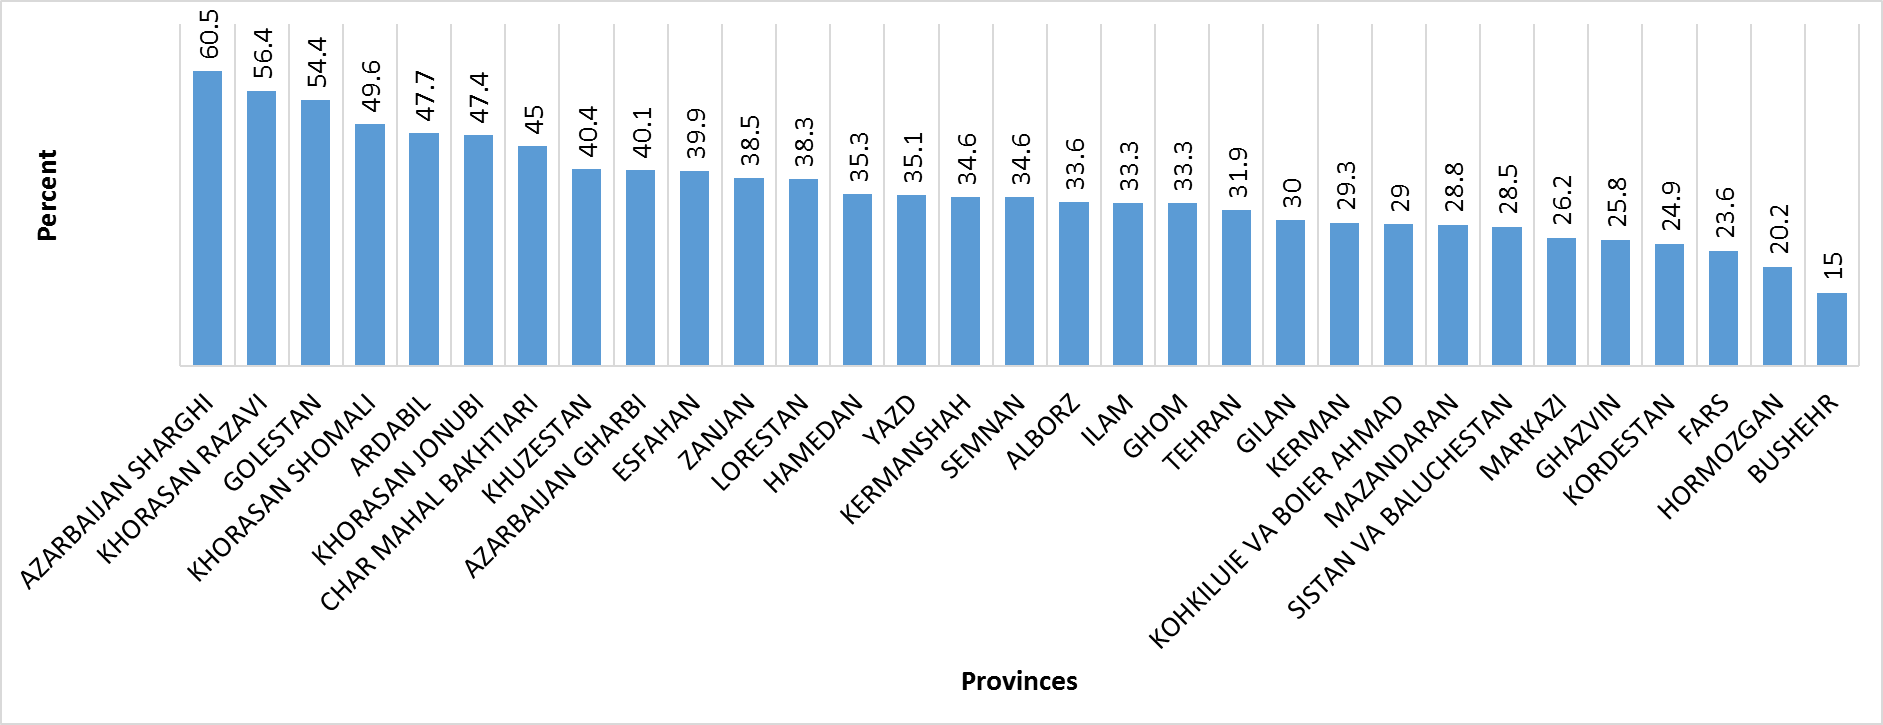


Supplementary Figure S3: Distribution of tumors located in cardia by provinces


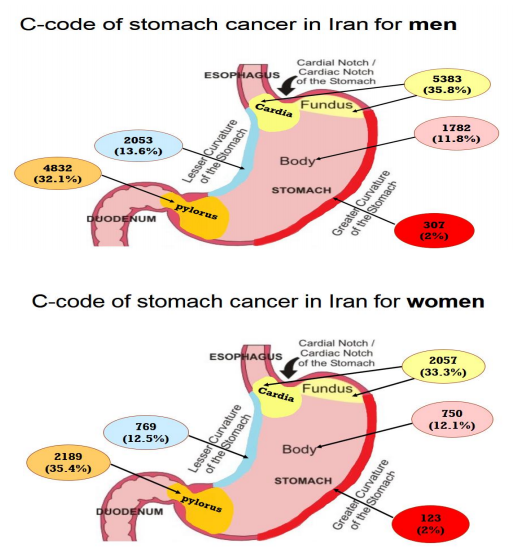


Supplementary Figure S4: distribution of the location of GC tumors in males and females (This figure were designed in GIS center, Department of Epidemiology, Shiraz University of Medical


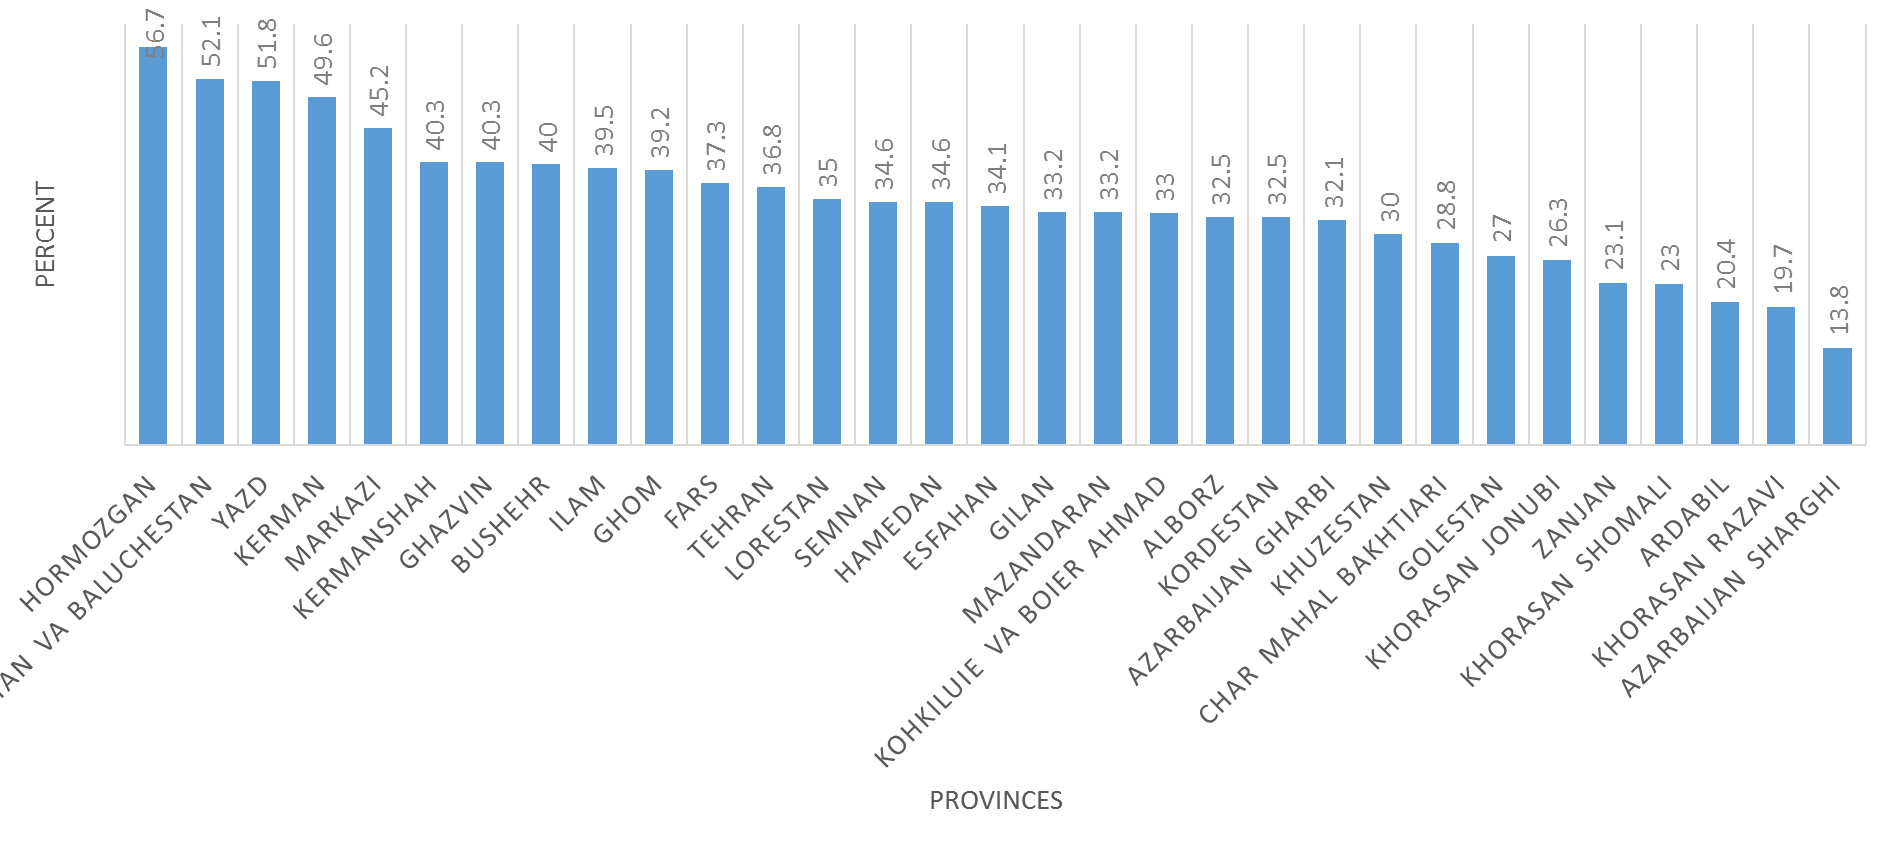


Supplementary Figure S5: distribution of tumour located in pylori by provinces
